# Supplementary material for: Visible-light-induced enzymatic reactions using an NADH regeneration system of water-soluble zinc porphyrin and homogeneous colloidal rhodium nanoparticles
Source: Royal Society of Chemistry journal article supplement (doi:10.1039/d2se00454b), 2022-01-01
Supplement: d2se00454b1.pdf [file d2se00454b1.pdf]

**Electronic Supplementary Information**

**Visible light-induced enzymatic reactions using a NADH  
regeneration system of water-soluble porphyrin and  
homogeneously rhodium nanoparticles**

Takayuki Katagiri<sup>a</sup> and Yutaka Amao<sup>\*a,b</sup>

a. Graduate School of Science, Osaka City University, 3-3-138 Sugimoto, Sumiyoshi-ku, Osaka  
558-8585, Japan

b. Research Centre for Artificial Photosynthesis (ReCAP), Osaka City University, 3-3-138 Sugimoto,  
Sumiyoshi-ku, Osaka 558-8585, Japan

E-mail: amao@osaka-cu.ac.jp

**Table of contents for Supporting Information**

|                                                                                                                                                                                             |   |
|---------------------------------------------------------------------------------------------------------------------------------------------------------------------------------------------|---|
| Experimental section .....                                                                                                                                                                  | 2 |
| Fig. S1. TEM images of Rh-PVP. ....                                                                                                                                                         | 3 |
| Fig. S2. UV-Vis absorption spectrum of Rh-PVP. ....                                                                                                                                         | 3 |
| Fig. S3. Irradiance spectrum of halogen lamp.....                                                                                                                                           | 4 |
| Fig. S5. Fluorescence spectra of ZnTPPS (1.0 $\mu$ M) in the presence and absence of Rh-PVP (250 $\mu$ M, —red) or NAD <sup>+</sup> (250 $\mu$ M, —blue) in HEPES-NaOH buffer (pH 7.4)..... | 5 |

## **Experimental section**

### **TEM measurement of Rh-PVP**

Transmission electron microscopy (TEM) was conducted to gain morphological information about the Rh nanoparticles in the catalyst. The particle size of Rh-PVP was estimated using TEM Image. For the transmission electron microscopy (TEM) measurements, a drop of the sample solutions was mounted on a carbon-covered copper mesh. The TEM images of Rh-PVP were recorded with a JEM-2100F (JEOL) electron microscope operated at 200 kV.

### **Fluorescence quenching behavior of ZnTPPS by Rh-PVP or NAD<sup>+</sup>**

Quenching of photoexcited state of ZnTPPS by Rh-PVP or NAD<sup>+</sup> was investigated using steady state fluorescence spectroscopy. The sample solution contained ZnTPPS (1.0  $\mu\text{M}$ ) and Rh-PVP (250  $\mu\text{M}$ ) or NAD<sup>+</sup> (1.25 mM) in 50 mM HEPES-NaOH buffer (pH 7.4). The excitation wavelength was 422 nm due to the Soret band of ZnTPPS. The fluorescence emission spectrum of ZnTPPS was measured using a fluorescence spectrophotometer (SHIMADZU, RF-5300PC) with a 150 W Xenon lamp as a visible excitation light source. Excitation and emission band-passes were 5.0 nm.

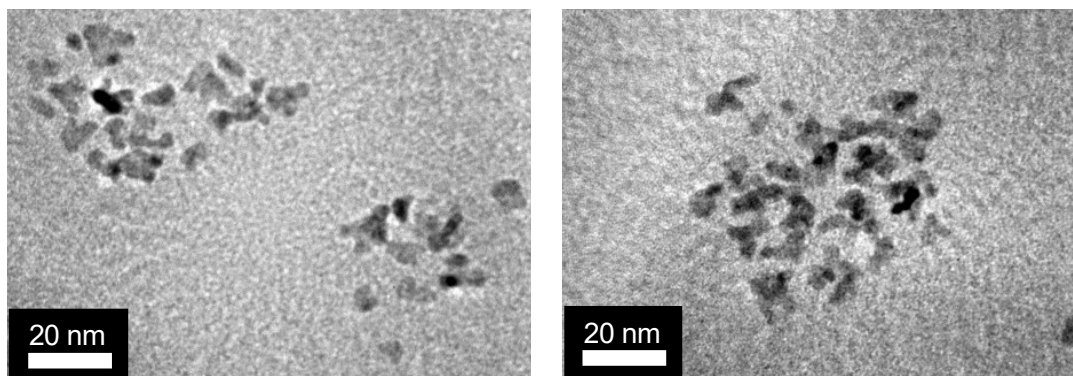

Fig. S1. TEM images of Rh-PVP.

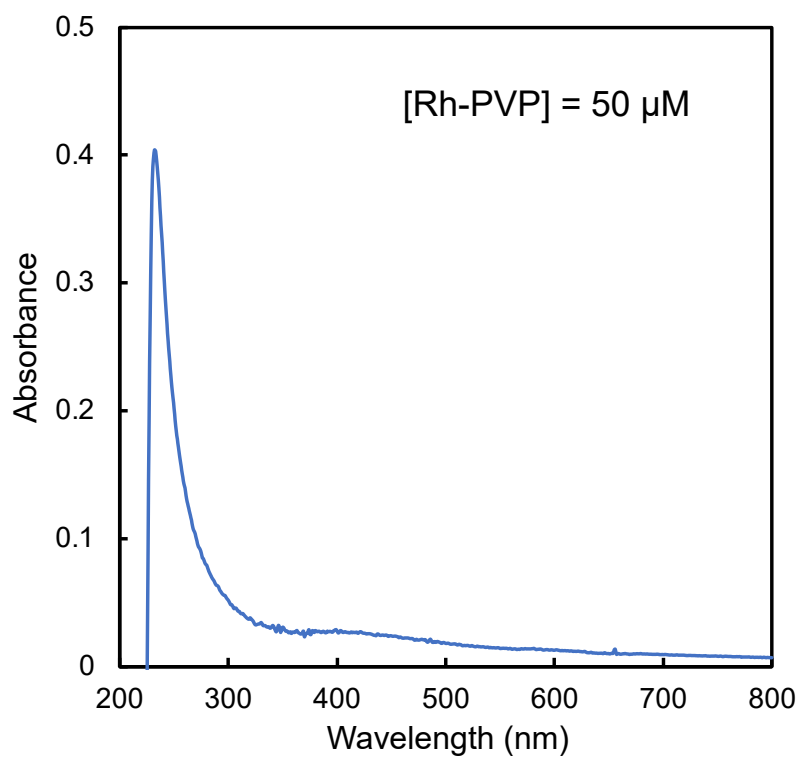

Fig. S2. UV-Vis absorption spectrum of Rh-PVP.

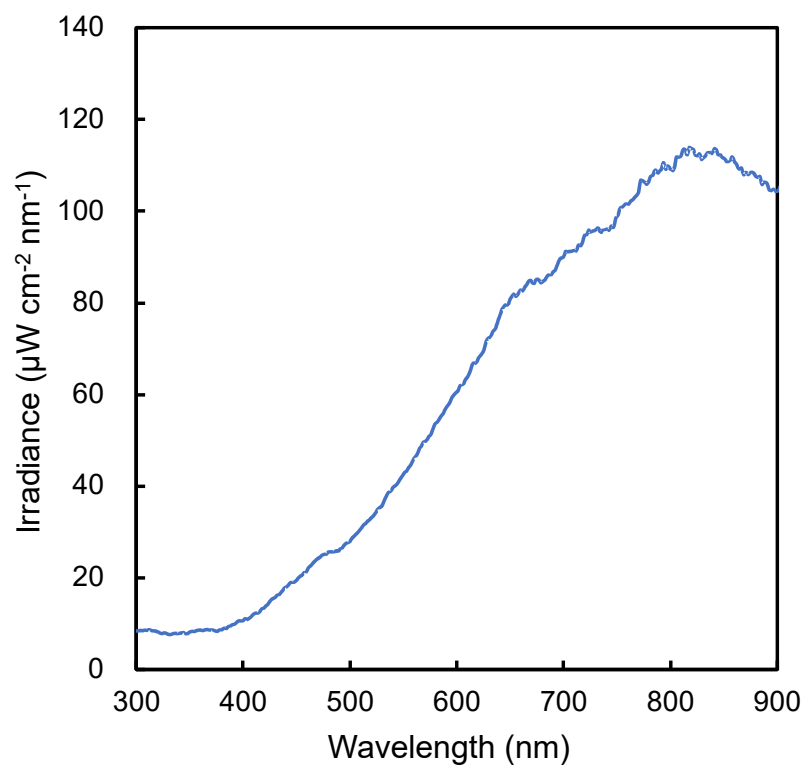

Fig. S3. Irradiance spectrum of halogen lamp.

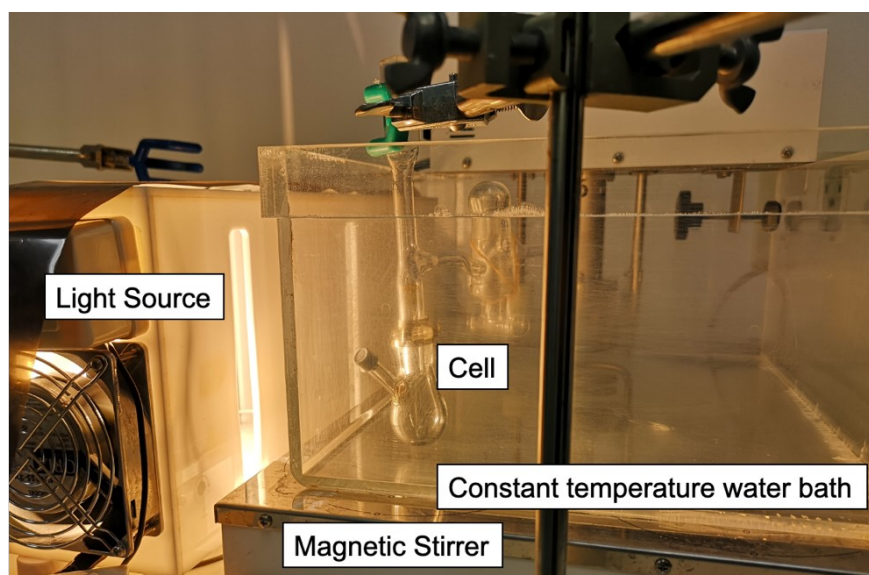

Fig. S4. The outline of an experimental setup for NAD<sup>+</sup> regeneration.

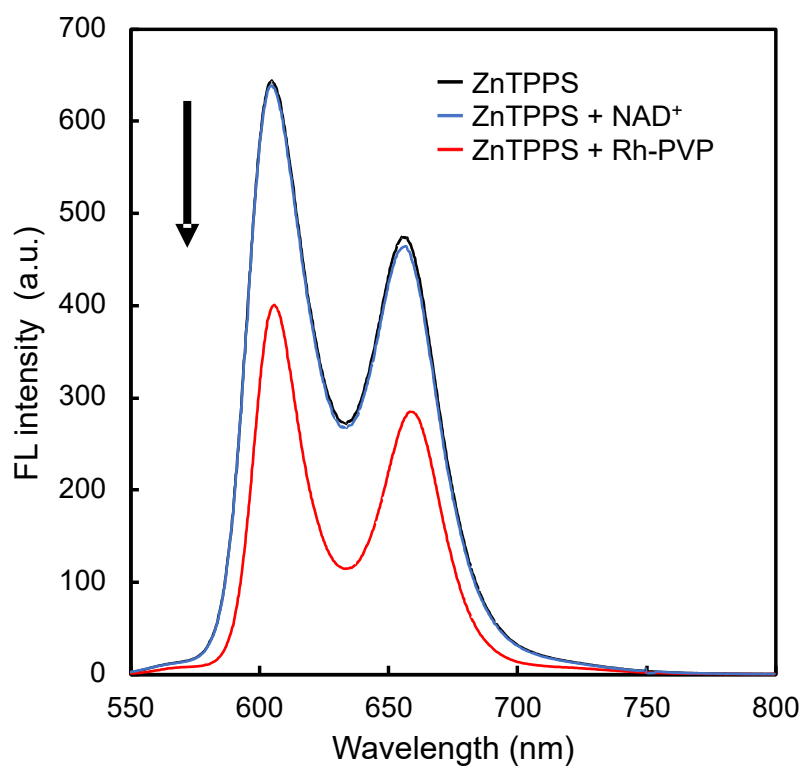

Fig. S5. Fluorescence spectra of ZnTPPS (1.0  $\mu\text{M}$ ) in the presence and absence of Rh-PVP (250  $\mu\text{M}$ , —red) or NAD<sup>+</sup> (250  $\mu\text{M}$ , —blue) in HEPES-NaOH buffer (pH 7.4).
